# Supplementary material for: Association between the Processed Dietary Pattern and Tumor Staging in Patients Newly Diagnosed with Head and Neck Squamous Cell Carcinoma
Source: MDPI journal article supplement (doi:10.3390/cancers15051476), 2023-02-25
Supplement: s1 [file s1]

**Article title:** Association Between Processed Dietary Pattern and Tumor Staging in Patients Newly Diagnosed with Head and Neck Squamous Cell Carcinoma

**Journal name:** Cancers

**Author names:** Ana Carolina da Silva Lima <sup>1,†</sup>, Tathiany Jéssica Ferreira <sup>2,†</sup>, Adriana Divina Silva Campos <sup>2</sup>, Larissa Morinaga Matida <sup>1</sup>, Maria Beatriz Trindade Castro <sup>2</sup>, Ana Amélia Freitas-Vilela <sup>3</sup> and Maria Aderuza Horst <sup>1,\*</sup>

**Affiliation:**

<sup>1</sup> Faculty of Nutrition, Federal University of Goiás, 74605-080, Goiânia, Brazil; anacarolinalima@discente.ufg.br (A.C.S.L.); larissamorinaga@discente.ufg.br (L.M.M.); aderuza@ufg.br (M.A.H.)

<sup>2</sup> Josué de Castro Nutrition Institute, Federal University of Rio de Janeiro, 21941-901, Rio de Janeiro, Brazil; tathianyferreira@ufrj.br (T.J.F.); acampos@ufrj.br (A.D.S.C.); mbtcastro@nutricao.ufrj.br (M.B.T.C.)

<sup>3</sup> Special Academic Unit of Health Sciences, Federal University of Goiás, 75801-615, Jataí, Brazil; anaameliafv@ufg.br

\* Correspondence: aderuza@ufg.br (M.A.H.); Tel.: +55 62 98250-9000

† These authors contributed equally to this work

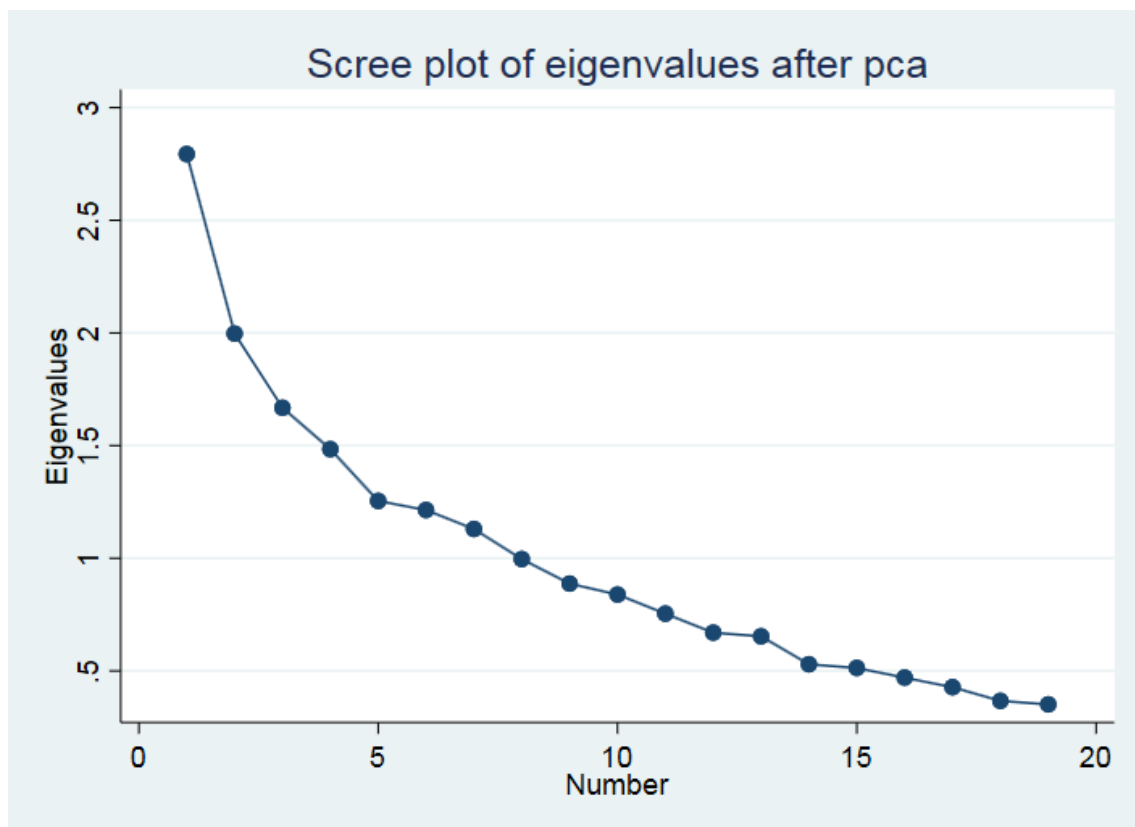

Figure S1. KMO test.

**Table S1.** Factorial loadings and communalities (h<sup>2</sup>) of the three patterns identified in patients with HNSCC.

| Food                         | Factorial loadings and communalities |              |              |                |
|------------------------------|--------------------------------------|--------------|--------------|----------------|
|                              | Healthy                              | Processed    | Mixed        | h <sup>2</sup> |
| Fruit                        | <b>0.469</b>                         | -0.081       | -0.155       | 0.483          |
| Tuber                        | <b>0.462</b>                         | 0.063        | 0.114        | 0.441          |
| Dairy products               | <b>0.398</b>                         | 0.156        | -0.027       | 0.522          |
| Fish                         | <b>0.316</b>                         | -0.160       | 0.052        | 0.767          |
| Grains                       | <b>0.308</b>                         | -0.0612      | 0.057        | 0.788          |
| Vegetables and legumes       | <b>0.232</b>                         | 0.176        | 0.065        | 0.753          |
| Fast Food                    | 0.016                                | <b>0.418</b> | -0.186       | 0.565          |
| Fats                         | 0.046                                | <b>0.407</b> | -0.095       | 0.608          |
| Breads                       | 0.092                                | <b>0.348</b> | -0.071       | 0.679          |
| Sugar-sweetened<br>beverages | -0.192                               | <b>0.330</b> | 0.063        | 0.734          |
| Cakes and cookies            | 0.053                                | <b>0.316</b> | 0.051        | 0.747          |
| Not tender meat              | -0.109                               | <b>0.302</b> | 0.106        | 0.778          |
| Tender meat                  | 0.144                                | <b>0.202</b> | 0.092        | 0.808          |
| Beer and wine                | -0.003                               | -0.145       | <b>0.495</b> | 0.484          |
| Distilled beverages          | -0.034                               | -0.074       | <b>0.485</b> | 0.524          |
| Pasta and flour              | 0.194                                | 0.042        | <b>0.367</b> | 0.618          |
| Bean                         | -0.100                               | 0.199        | <b>0.367</b> | 0.623          |
| Rice                         | 0.067                                | 0.060        | <b>0.277</b> | 0.816          |
| Coffee                       | -0.147                               | 0.176        | <b>0.226</b> | 0.801          |
| Number of the groups         | 6                                    | 6            | 6            |                |

|                       |       |       |       |
|-----------------------|-------|-------|-------|
| Eigenvalues           | 2.79  | 1.99  | 1.67  |
| % explained variance  | 11.93 | 11.50 | 10.57 |
| % cumulative variance | 11.93 | 23.43 | 34.00 |
